# Supplementary material for: Improved recovery of urinary small extracellular vesicles by differential ultracentrifugation
Source: PubMed Central journal article supplement (PMC11133306; doi:10.1038/s41598-024-62783-9), 2024-05-28
Supplement: 41598_2024_62783_MOESM2_ESM.pdf [file 41598_2024_62783_MOESM2_ESM.pdf]

## **Supplementary Material 2 – Teixeira-Marques *et al.* Improved recovery of urinary small extracellular vesicles by differential ultracentrifugation**

Supplementary Figure S1 – Dot plots from optical densitometry values measured from CD9, CD81, CD63, Alix, Flotillin-1 and THP signals obtained by Western-blot of all samples used for UC25min, UC48min and UC60min protocols.

Supplementary Figure S2 – Dot plots from optical densitometry values measured from CD9, CD81, CD63, Alix, Flotillin-1 and THP signals obtained by Western-blot of all samples used for UC48min and UCLEVs protocols.

Supplementary Figure S3 – Dot plots of optical densitometry values from CD9, CD81, CD63, Alix, Flotillin-1 and THP signals obtained by Western-blot of all samples used for UC48min and UCwash protocols.

Supplementary Figure S4 – Dot plots from optical densitometry values measured from CD9, CD81, CD63, Alix, Flotillin-1 and THP signals obtained by Western-blot of all samples used for UC48min, dUC and EXO methods.

Supplementary Figure S5 – Dot plots from optical densitometry values measured from CD9, CD81, CD63, Alix, Flotillin-1, THP and Cytochrome C signals obtained by Western-blot of all samples used for UC48min, dUC and methods.

Supplementary Figure S6 – Dot plots from optical densitometry values measured from CD9, CD81, CD63, Alix, Flotillin-1, THP, Lamin A/C and Cytochrome C signals obtained by Western-blot of all samples used for UC48min, dUC and EXO methods. Horizontal black lines represent the means of tested samples per condition.

Supplementary Figure S7 – Raw figures corresponding to the Western-Blot from ultracentrifugation time period optimization (UC25min, UC48min and UC60min protocols) and UC48min versus UC with washing (UCwash).

Supplementary Figure S8 – Raw figure of the Western-blot corresponding to large EVs (LEVs) pelleting (UCLEVs) versus urine supernatant filtering (UC48min) protocols.

Supplementary Figure S9 – Raw figure of the Western-blot from optimized differential ultracentrifugation (UC48min), density ultracentrifugation (dUC) and Exoquick (EXO) methods.

Supplementary Figure S10 – Raw figures of the Western-blot from 3 independent urine EV samples separated using UC48min and dUC represented in Figure S3 from Supplementary Material 1.

Supplementary Figure S11 – Raw figure of the Western-blot from 7 independent urine samples separated using UC48min, represented in Figure S6 from Supplementary Material 1.

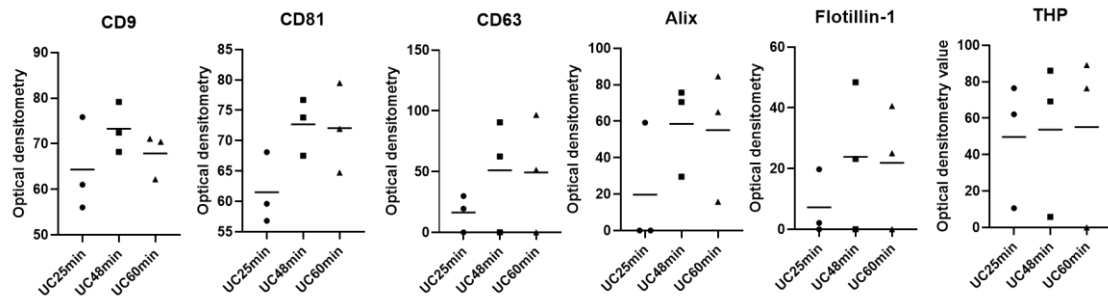

**Supplementary Figure S1.** Dot plots from optical densitometry values measured from CD9, CD81, CD63, Alix, Flotillin-1 and THP signals obtained by Western-blot of all samples used for UC25min, UC48min and UC60min protocols. Horizontal black lines represent the means of tested samples per condition.

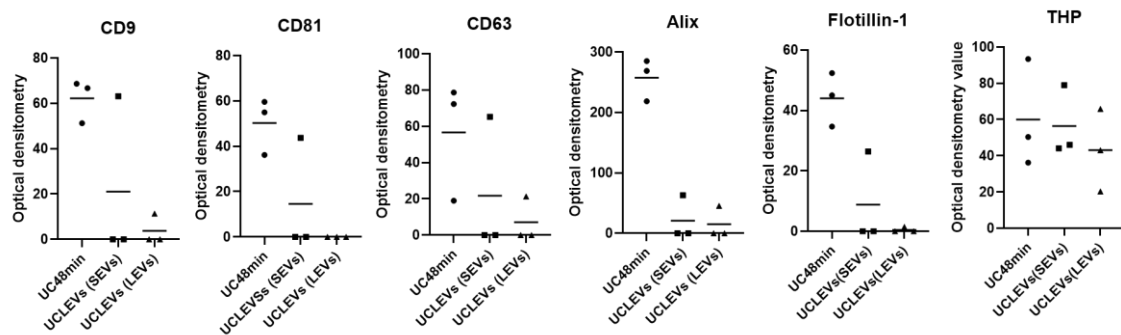

**Supplementary Figure S2.** Dot plots from optical densitometry values measured from CD9, CD81, CD63, Alix, Flotillin-1 and THP signals obtained by Western-blot of all samples used for UC48min and UCLEVs protocols. Horizontal black lines represent the means of tested samples per condition.

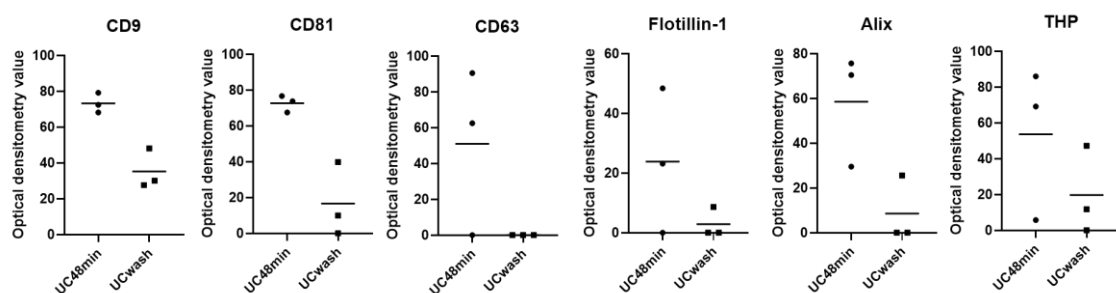

**Supplementary Figure S3.** Dot plots from optical densitometry values measured from CD9, CD81, CD63, Alix, Flotillin-1 and THP signals obtained by Western-blot of all samples used for UC48min and UCwash protocols. Horizontal black lines represent the means of tested samples per condition.

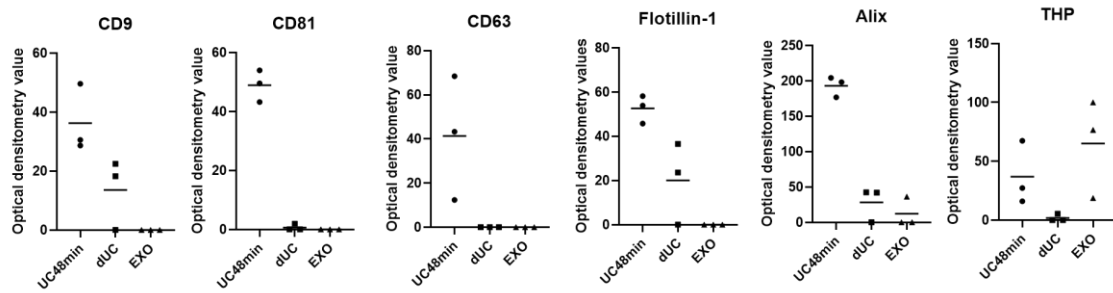

**Supplementary Figure S4.** Dot plots from optical densitometry values measured from CD9, CD81, CD63, Alix, Flotillin-1 and THP signals obtained by Western-blot of all samples used for UC48min, dUC and EXO methods. Horizontal black lines represent the means of tested samples per condition.

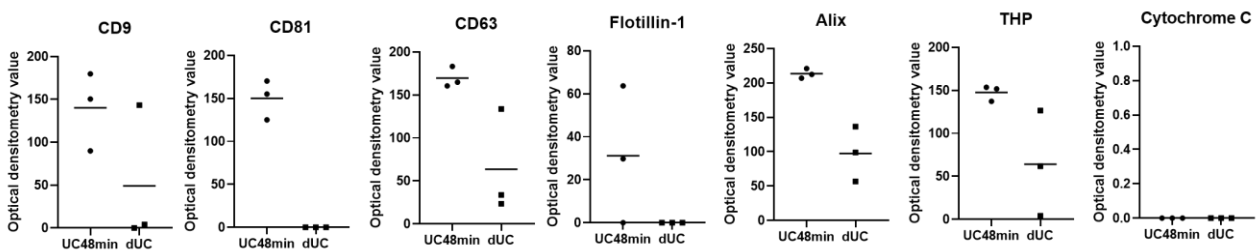

**Supplementary Figure S5.** Dot plots from optical densitometry values measured from CD9, CD81, CD63, Alix, Flotillin-1, THP and Cytochrome C signals obtained by Western-blot of all samples used for UC48min, dUC methods. Horizontal black lines represent the means of tested samples per condition.

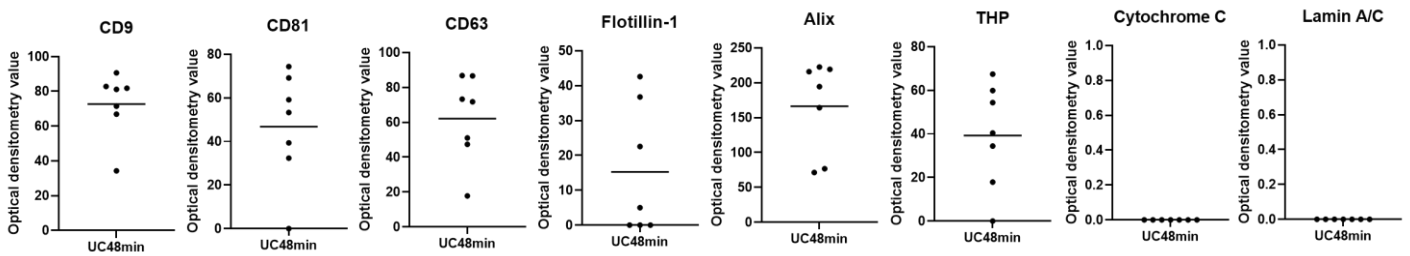

**Supplementary Figure S6.** Dot plots from optical densitometry values measured from CD9, CD81, CD63, Alix, Flotillin-1, THP, Lamin A/C and Cytochrome C signals obtained by Western-blot of all samples used for UC48min, dUC and EXO methods. Horizontal black lines represent the means of tested samples per condition.

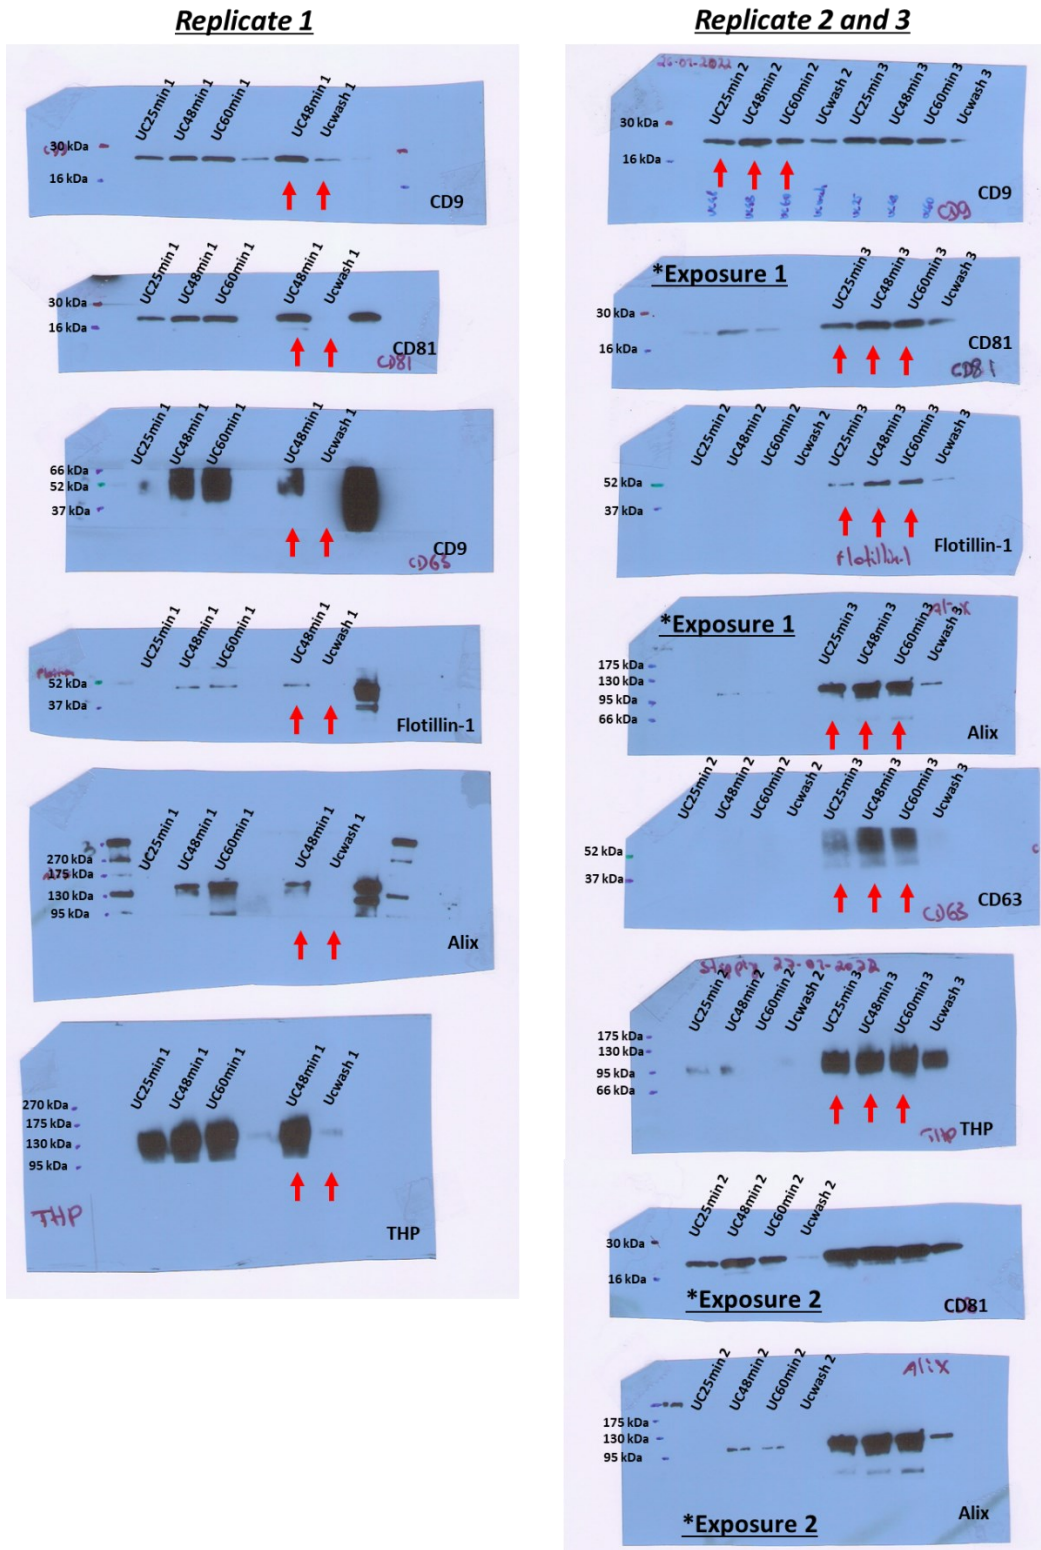

**Supplementary Figure S7** – Raw figures corresponding to the Western-Blot from ultracentrifugation time period optimization (UC25min, UC48min and UC60min protocols) and UC48min versus differential ultracentrifugation with washing (Ucwash). Red arrows pinpoint blots that were represented in Figure 2 and Figure 4. For each experiment 3 replicates were performed (replicates are referred as 1, 2 or 3). Films containing asterisks correspond to 2 different time exposures for CD81 and Alix in order to have the optimal signal for replicate 2 and 3. Optimal exposure for CD81 and Alix in replicate 2 was Exposure 2, while in replicate 3 for CD81 and Alix optimal exposure was Exposure 1.

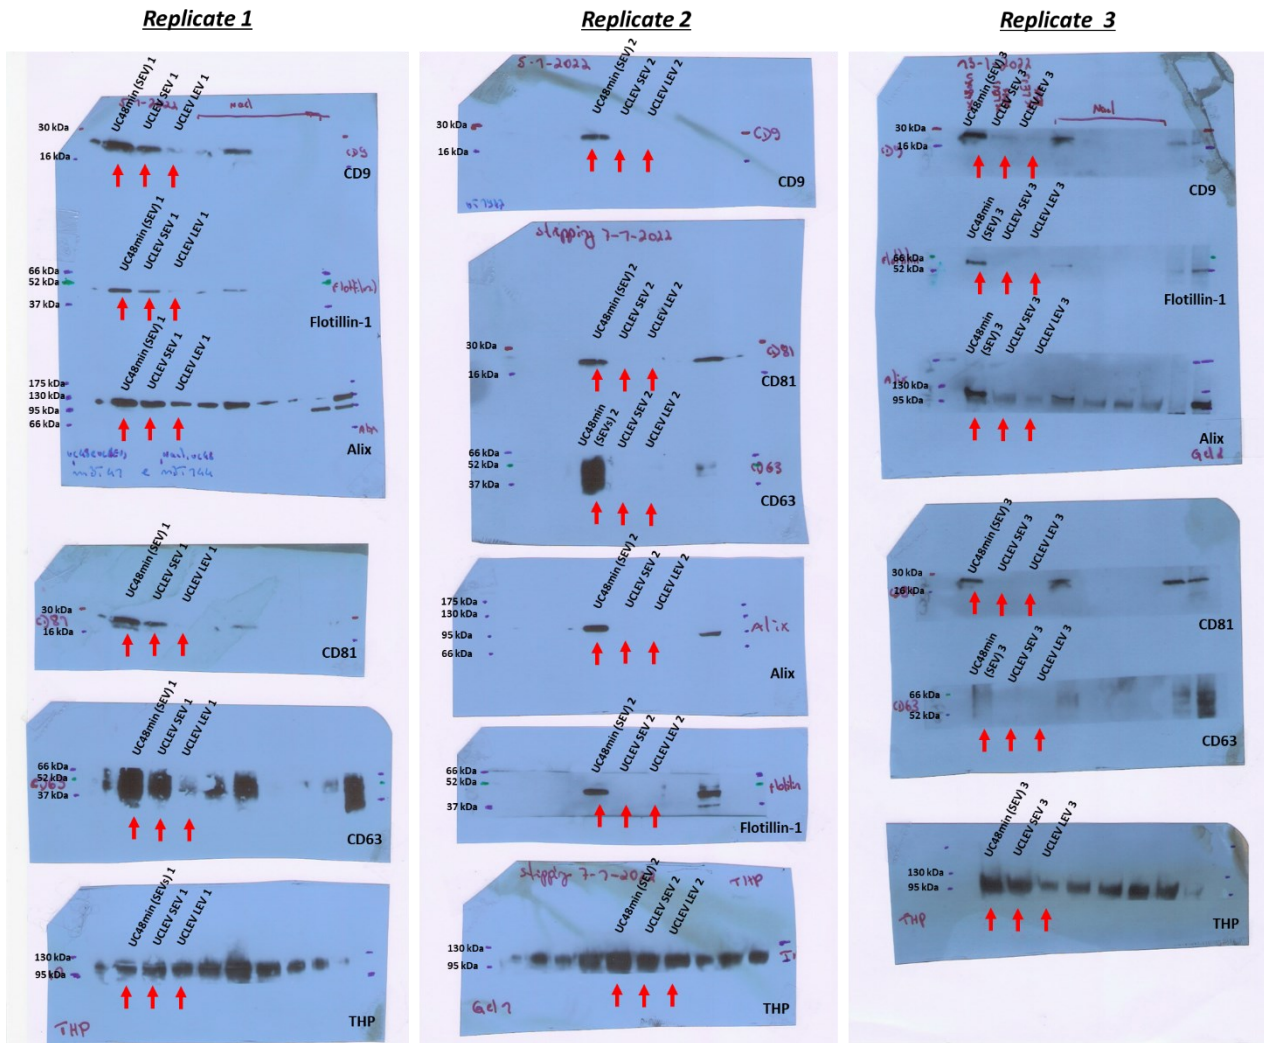

**Supplementary Figure S8** – Raw figure of the Western-blot corresponding to large EVs (LEVs) pelleting (UCLEVs) versus urine supernatant filtering (UC48min) protocols. Red arrows pinpoint blots that ARE represented in Figure 3 and Figure S2 from Supplementary Material 1 (3 replicates were performed; replicates are referred as 1, 2 or 3).

**Replicate 1 and 2**

**Replicate 3**

**Replicate 1, 2 and 3**

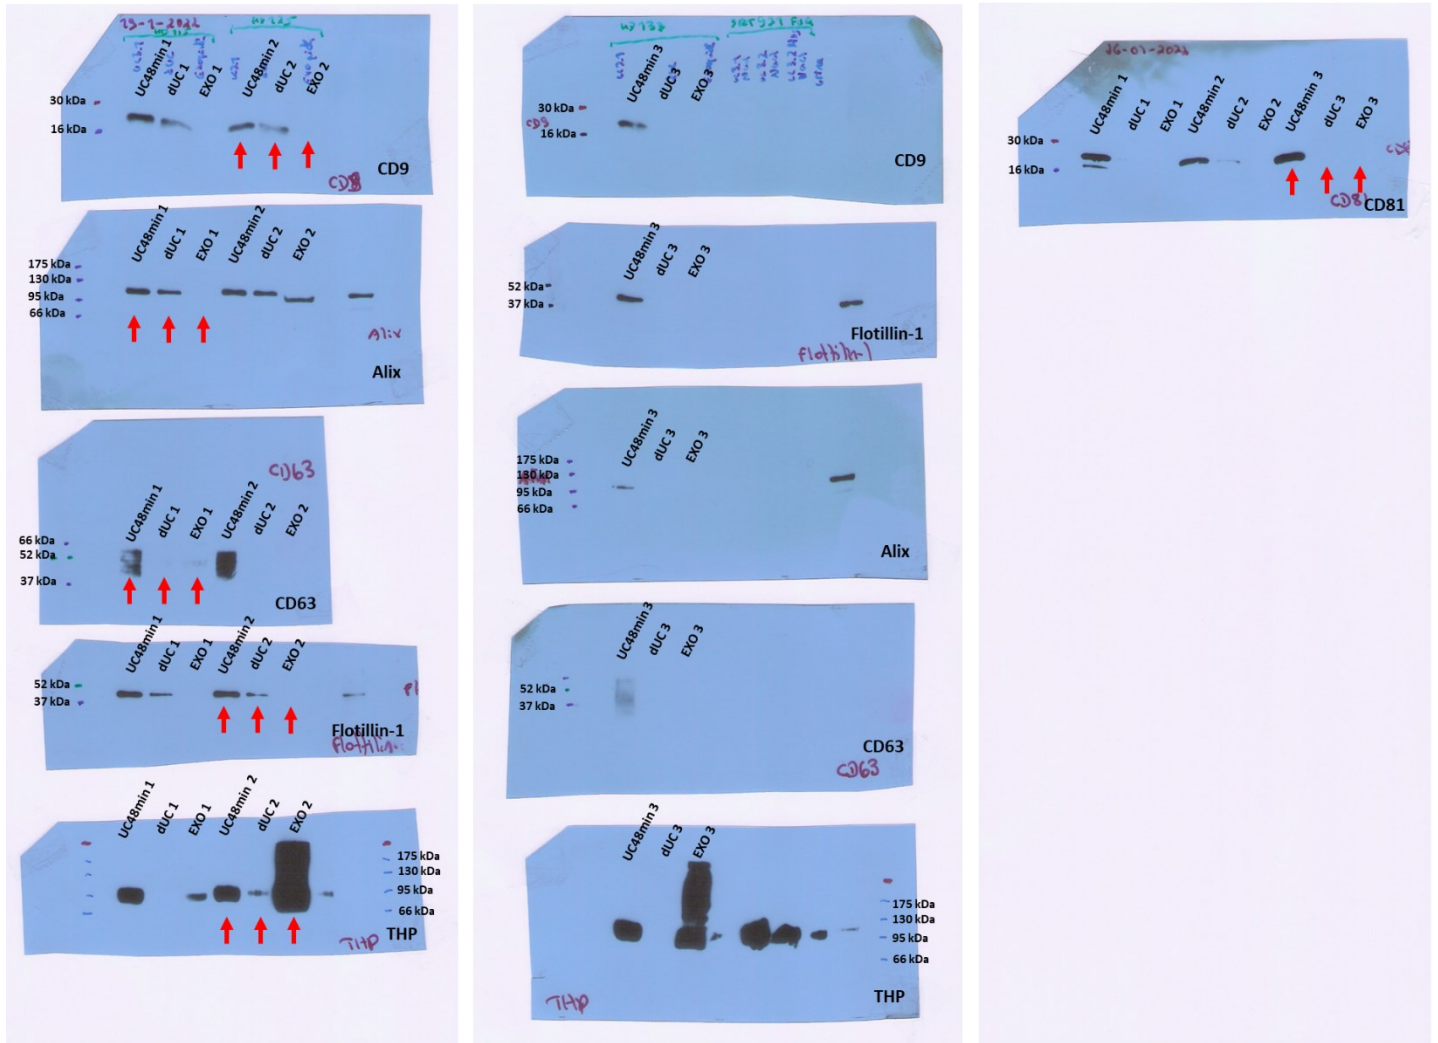

**Supplementary Figure S9** – Raw figure of the Western-blot from optimized differential ultracentrifugation (UC48min), density ultracentrifugation (dUC) and Exoquick (EXO) methods. Red arrows pinpoint blots that were represented in Figure 5. For each experiment 3 replicates were performed (replicates are referred as 1, 2 or 3).

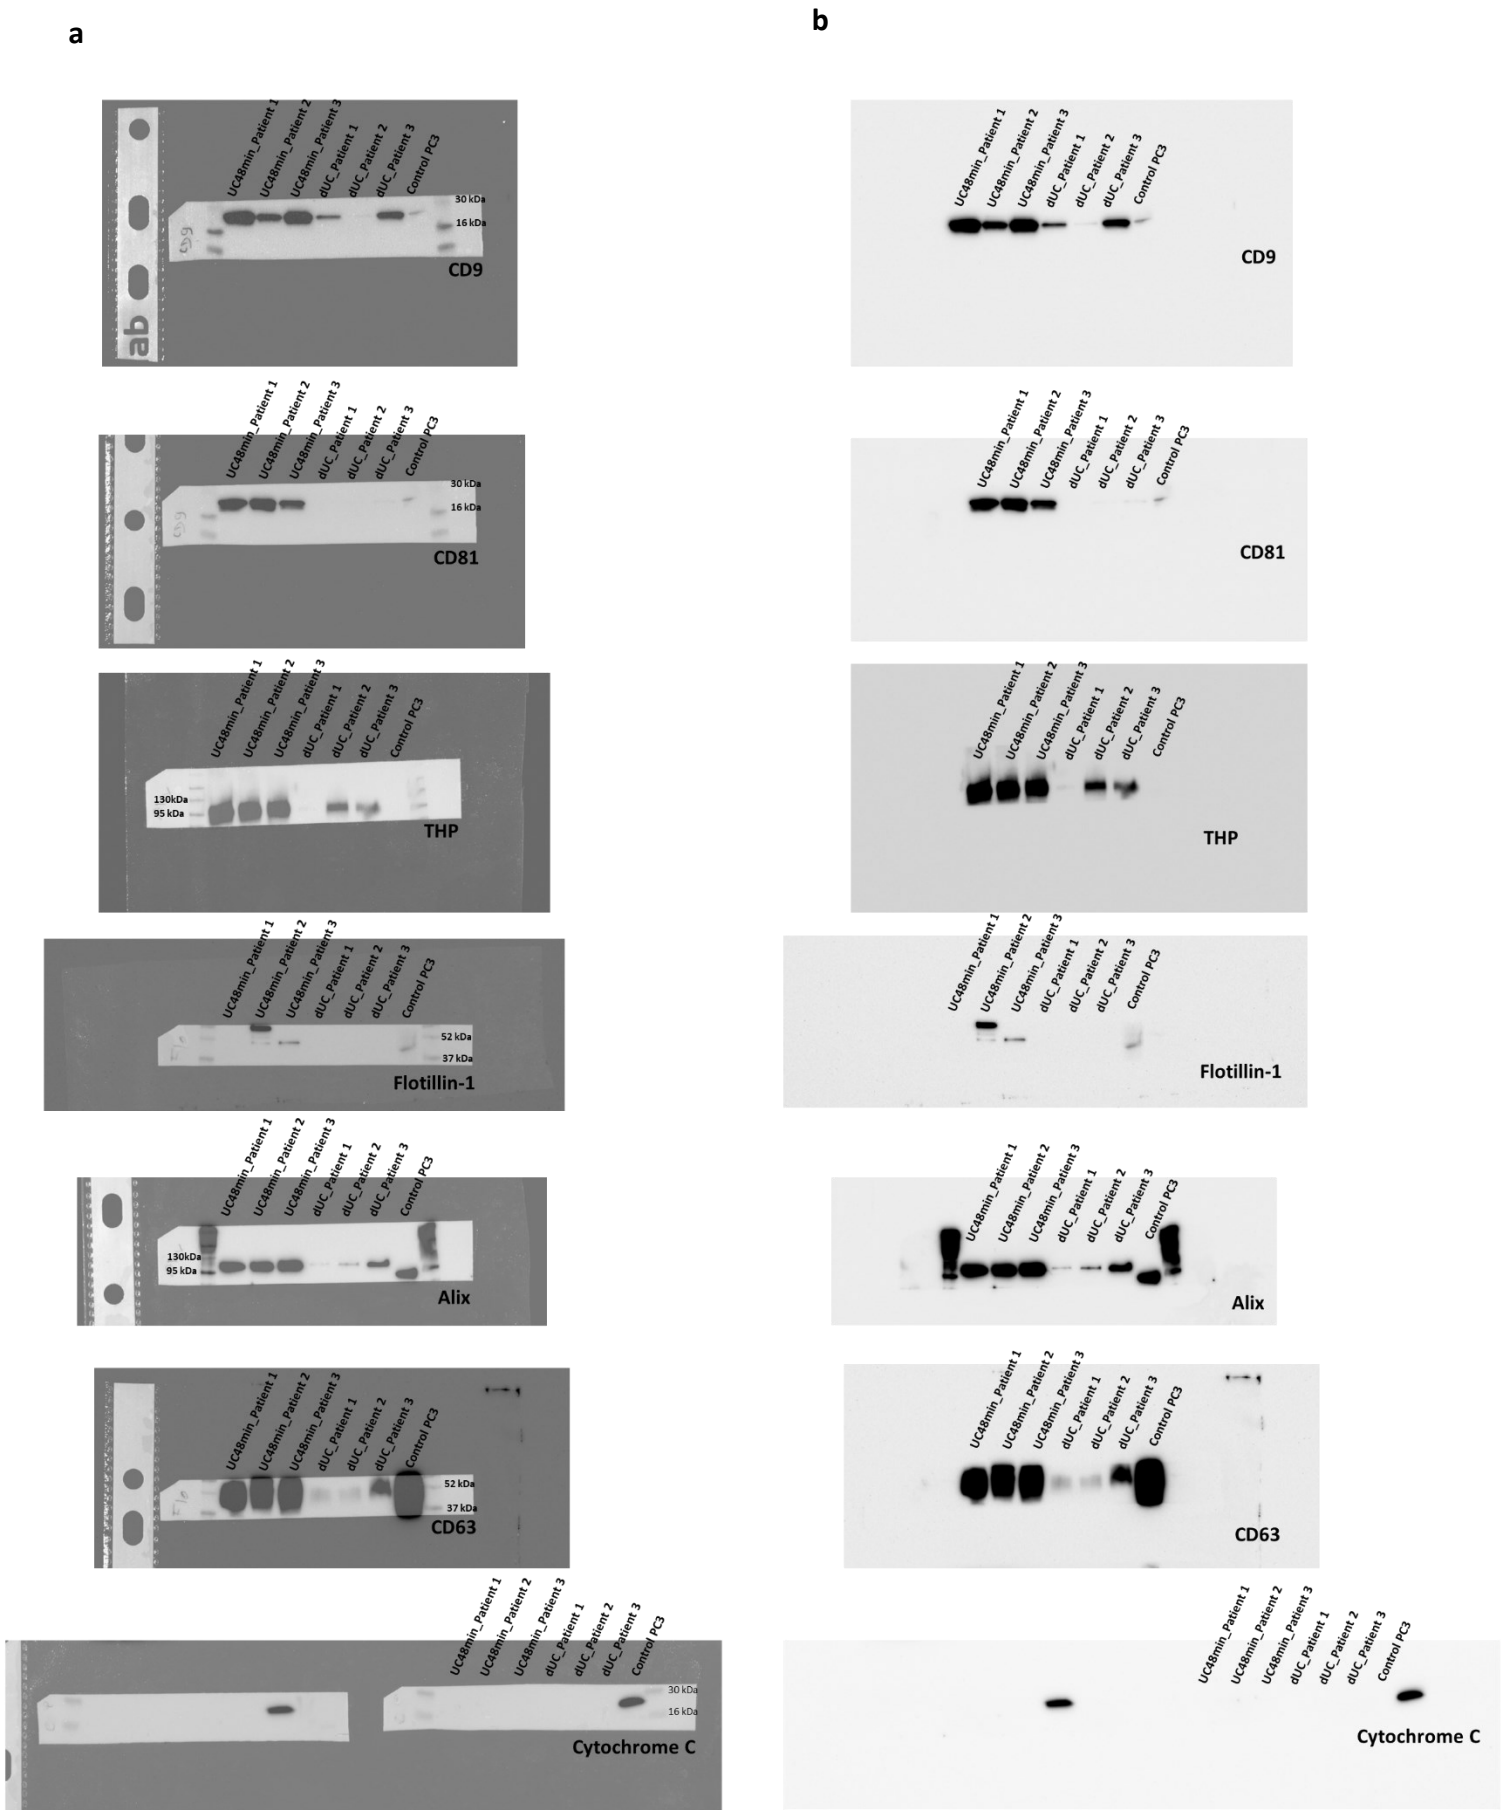

**Supplementary Figure S10** – Raw figures of the Western-blot from 3 independent urine EV samples separated using UC48min and dUC that are represented in Figure S3 from Supplementary Material 1. **(a)** Raw image from Western-blot signal image merged with membrane image. **(b)** Raw image from Western-blot signal.

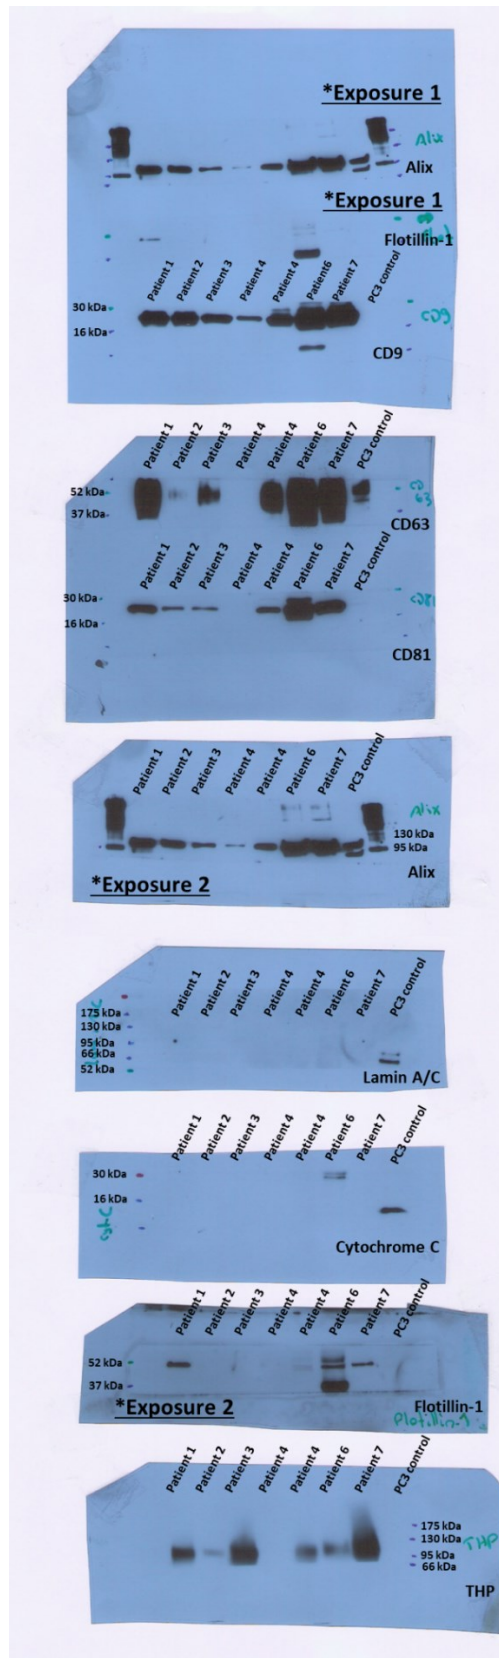

**Supplementary Figure S11** – Raw image of the Western-blot from 7 independent urine samples separated using UC48min, represented in Figure S6 from Supplementary Material 1. Membranes containing asterisks are representative of 2 different time exposures for Alix and Flotillin-1. Exposure 2 was considered the optimal exposure for both Alix and Flotillin-1.
