# Supplementary material for: Improved recovery of urinary small extracellular vesicles by differential ultracentrifugation
Source: PubMed Central journal article supplement (PMC11133306; doi:10.1038/s41598-024-62783-9), 2024-05-28
Supplement: 41598_2024_62783_MOESM3_ESM.pdf [file 41598_2024_62783_MOESM3_ESM.pdf]

**Supplementary Material 3 - Teixeira-Marques *et al.* Improved recovery of urinary small extracellular vesicles by differential ultracentrifugation**

Supplementary Table S1 – Calculated optical densitometry values of Western-blot corresponding to UC25min, UC48min and UC60min protocols.

Supplementary Table S2 – Calculated optical densitometry values of Western-blot corresponding to UC48min and UCLEVs protocols.

Supplementary Table S3 – Calculated optical densitometry values of Western-blot corresponding to UC48min and UCwash protocols.

Supplementary Table S4 – Calculated optical densitometry values of Western-blot corresponding to UC48min and dUC and EXO protocols.

Supplementary Table S5 – Calculated optical densitometry values of Western-blot corresponding to UC48min and dUC methods.

Supplementary Table S6 – Calculated optical densitometry values of Western-blot corresponding to UC48min protocol.

**Supplementary Table S1.** Calculated optical densitometry values of Western-blots correspondent to UC25min, UC48min and UC60min protocols.

| Figure 2 |            | CD9     |          |            |          |              | CD81    |          |            |          |                    | CD63    |          |            |          |                    |
|----------|------------|---------|----------|------------|----------|--------------|---------|----------|------------|----------|--------------------|---------|----------|------------|----------|--------------------|
|          |            | CD9     | inverted | background | inverted | OD           | CD81    | inverted | background | inverted | OD                 | CD63    | inverted | background | inverted | OD                 |
| UC25min  | 1          | 119,804 | 135,20   | 180,833    | 74,17    | <b>61,03</b> | 117,608 | 137,392  | 177,216    | 77,784   | <b>59,608</b>      | 159,973 | 95,027   | 179,536    | 75,464   | 19,563             |
|          | 2          | 129,23  | 125,77   | 185,257    | 69,74    | <b>56,03</b> | 111,965 | 143,035  | 180,068    | 74,932   | <b>68,103</b>      | 181,112 | 73,888   | 181,112    | 73,888   | 0                  |
|          | 3          | 109,412 | 145,59   | 185,257    | 69,74    | <b>75,85</b> | 121,358 | 133,642  | 178,163    | 76,837   | <b>56,805</b>      | 151,19  | 103,81   | 181,112    | 73,888   | 29,922             |
|          | Mean (n=3) |         |          |            |          | <b>64,30</b> |         |          |            |          | <b>61,50533333</b> |         |          |            |          | <b>16,495</b>      |
| UC48min  | 1          | 112,615 | 142,39   | 180,833    | 74,17    | <b>68,22</b> | 109,668 | 145,332  | 177,216    | 77,784   | <b>67,548</b>      | 89,02   | 165,98   | 179,536    | 75,464   | 90,516             |
|          | 2          | 112,795 | 142,21   | 185,257    | 69,74    | <b>72,46</b> | 106,252 | 148,748  | 180,068    | 74,932   | <b>73,816</b>      | 181,112 | 73,888   | 181,112    | 73,888   | 0                  |
|          | 3          | 106,077 | 148,92   | 185,257    | 69,74    | <b>79,18</b> | 101,457 | 153,543  | 178,163    | 76,837   | <b>76,706</b>      | 118,611 | 136,389  | 181,112    | 73,888   | 62,501             |
|          | Mean (n=3) |         |          |            |          | <b>73,29</b> |         |          |            |          | <b>72,69</b>       |         |          |            |          | <b>51,00566667</b> |
| UC60min  | 1          | 110,431 | 144,57   | 180,833    | 74,17    | <b>70,40</b> | 97,722  | 157,278  | 177,216    | 77,784   | <b>79,494</b>      | 82,826  | 172,174  | 179,536    | 75,464   | 96,71              |
|          | 2          | 123,09  | 131,91   | 185,257    | 69,74    | <b>62,17</b> | 115,322 | 139,678  | 180,068    | 74,932   | <b>64,746</b>      | 181,112 | 73,888   | 181,112    | 73,888   | 0                  |
|          | 3          | 114,172 | 140,83   | 185,257    | 69,74    | <b>71,09</b> | 106,23  | 148,77   | 178,163    | 76,837   | <b>71,933</b>      | 129,707 | 125,293  | 181,112    | 73,888   | 51,405             |
|          | Mean (n=3) |         |          |            |          | <b>67,88</b> |         |          |            |          | <b>72,05766667</b> |         |          |            |          | <b>49,37166667</b> |

| Figure 2 |            | Alix    |          |            |          |                    | Flotillin-1 |          |            |          |                    | THP     |          |            |          |                    |
|----------|------------|---------|----------|------------|----------|--------------------|-------------|----------|------------|----------|--------------------|---------|----------|------------|----------|--------------------|
|          |            | Alix    | inverted | background | inverted | OD                 | Flotillin-1 | inverted | background | inverted | OD                 | THP     | inverted | background | inverted | OD                 |
| UC25min  | 1          | 174,536 | 80,464   | 174,536    | 80,464   | 0                  | 176,574     | 78,426   | 178,674    | 76,326   | 2,1                | 99,799  | 155,201  | 176,295    | 78,705   | 76,496             |
|          | 2          | 178,818 | 76,182   | 178,818    | 76,182   | 0                  | 179,49      | 75,51    | 179,49     | 75,51    | 0                  | 167,223 | 87,777   | 177,814    | 77,186   | 10,591             |
|          | 3          | 119,419 | 135,581  | 178,6      | 76,4     | 59,181             | 159,733     | 95,267   | 179,49     | 75,51    | 19,757             | 115,654 | 139,346  | 177,814    | 77,186   | 62,16              |
|          | Mean (n=3) |         |          |            |          | <b>19,727</b>      |             |          |            |          | <b>7,285666667</b> |         |          |            |          | <b>49,749</b>      |
| UC48min  | 1          | 104,035 | 150,965  | 174,536    | 80,464   | 70,501             | 155,498     | 99,502   | 178,674    | 76,326   | 23,176             | 90,227  | 164,773  | 176,295    | 78,705   | 86,068             |
|          | 2          | 149,26  | 105,74   | 178,818    | 76,182   | 29,558             | 179,49      | 75,51    | 179,49     | 75,51    | 0                  | 172,038 | 82,962   | 177,814    | 77,186   | 5,776              |
|          | 3          | 102,917 | 152,083  | 178,6      | 76,4     | 75,683             | 131,081     | 123,919  | 179,49     | 75,51    | 48,409             | 108,565 | 146,435  | 177,814    | 77,186   | 69,249             |
|          | Mean (n=3) |         |          |            |          | <b>58,58066667</b> |             |          |            |          | <b>23,86166667</b> |         |          |            |          | <b>53,69766667</b> |
| UC60min  | 1          | 89,932  | 165,068  | 174,536    | 80,464   | 84,604             | 153,593     | 101,407  | 178,674    | 76,326   | 25,081             | 87,179  | 167,821  | 176,295    | 78,705   | 89,116             |
|          | 2          | 163,022 | 91,978   | 178,818    | 76,182   | 15,796             | 179,49      | 75,51    | 179,49     | 75,51    | 0                  | 177,814 | 77,186   | 177,814    | 77,186   | 0                  |
|          | 3          | 113,602 | 141,398  | 178,6      | 76,4     | 64,998             | 138,924     | 116,076  | 179,49     | 75,51    | 40,566             | 101,471 | 153,529  | 177,814    | 77,186   | 76,343             |
|          | Mean (n=3) |         |          |            |          | <b>55,13266667</b> |             |          |            |          | <b>21,88233333</b> |         |          |            |          | <b>55,153</b>      |

Abbreviation: OD – Optical Densitometry value

**Supplementary Table S2.** Calculated optical densitometry values of Western-blot correspond to UC48min and UCLEVs protocols.

| Figure 3; Figure S2 in Supplementary Material 1 |            | CD9     |          |            |          |              | CD81    |          |            |          |                    | CD63    |          |            |          |                    |
|-------------------------------------------------|------------|---------|----------|------------|----------|--------------|---------|----------|------------|----------|--------------------|---------|----------|------------|----------|--------------------|
|                                                 |            | CD9     | inverted | background | inverted | OD           | CD81    | inverted | background | inverted | OD                 | CD63    | inverted | background | inverted | OD                 |
| UC48min                                         | 1          | 113,328 | 141,67   | 179,998    | 75,00    | <b>66,67</b> | 122,493 | 132,507  | 177,459    | 77,541   | <b>54,966</b>      | 98,054  | 156,946  | 176,691    | 78,309   | <b>78,637</b>      |
|                                                 | 2          | 83,864  | 171,14   | 152,51     | 102,49   | <b>68,65</b> | 104,56  | 150,44   | 140,728    | 114,272  | <b>36,168</b>      | 130,786 | 124,214  | 149,711    | 105,289  | <b>18,925</b>      |
|                                                 | 3          | 129,063 | 125,94   | 180,261    | 74,74    | <b>51,20</b> | 117,657 | 137,343  | 177,205    | 77,795   | <b>59,548</b>      | 102,83  | 152,17   | 175,089    | 79,911   | <b>72,259</b>      |
|                                                 | Mean (n=3) |         |          |            |          | <b>62,17</b> |         |          |            |          | <b>50,22733333</b> |         |          |            |          | <b>56,607</b>      |
| UCLEVs (SEVs)                                   | 1          | 116,886 | 138,11   | 179,998    | 75,00    | <b>63,11</b> | 133,728 | 121,272  | 177,459    | 77,541   | <b>43,731</b>      | 111,487 | 143,513  | 176,691    | 78,309   | <b>65,204</b>      |
|                                                 | 2          | 152,51  | 102,49   | 152,51     | 102,49   | <b>0,00</b>  | 140,728 | 114,272  | 140,728    | 114,272  | <b>0</b>           | 149,711 | 105,289  | 149,711    | 105,289  | <b>0</b>           |
|                                                 | 7          | 180,261 | 74,74    | 180,261    | 74,74    | <b>0,00</b>  | 177,205 | 77,795   | 177,205    | 77,795   | <b>0</b>           | 175,089 | 79,911   | 175,089    | 79,911   | <b>0</b>           |
|                                                 | Mean (n=3) |         |          |            |          | <b>21,04</b> |         |          |            |          | <b>14,577</b>      |         |          |            |          | <b>21,73466667</b> |
| UCLEVs (LEVs)                                   | 1          | 168,647 | 86,35    | 179,998    | 75,00    | <b>11,35</b> | 177,459 | 77,541   | 177,459    | 77,541   | <b>0</b>           | 155,402 | 99,598   | 176,691    | 78,309   | <b>21,289</b>      |
|                                                 | 2          | 152,51  | 102,49   | 152,51     | 102,49   | <b>0,00</b>  | 140,728 | 114,272  | 140,728    | 114,272  | <b>0</b>           | 149,711 | 105,289  | 149,711    | 105,289  | <b>0</b>           |
|                                                 | 3          | 180,261 | 74,74    | 180,261    | 74,74    | <b>0,00</b>  | 177,205 | 77,795   | 177,205    | 77,795   | <b>0</b>           | 175,089 | 79,911   | 175,089    | 79,911   | <b>0</b>           |
|                                                 | Mean (n=3) |         |          |            |          | <b>3,78</b>  |         |          |            |          | <b>0</b>           |         |          |            |          | <b>7,096333333</b> |

| Figure 3; Supplementary Material 1, Figure S2 |            | Alix    |          |            |          |                    | Flotillin-1 |          |            |          |                    | THP     |          |            |          |                    |
|-----------------------------------------------|------------|---------|----------|------------|----------|--------------------|-------------|----------|------------|----------|--------------------|---------|----------|------------|----------|--------------------|
|                                               |            | Alix    | inverted | background | inverted | OD                 | Flotillin-1 | inverted | background | inverted | OD                 | THP     | inverted | background | inverted | OD                 |
| UC48min                                       | 1          | 111,664 | 143,336  | 179,998    | 75,002   | <b>218,338</b>     | 133,636     | 121,364  | 178,674    | 76,326   | <b>45,038</b>      | 145,833 | 109,167  | 182,069    | 72,931   | <b>36,236</b>      |
|                                               | 2          | 89,684  | 165,316  | 135,417    | 119,583  | <b>284,899</b>     | 126,715     | 128,285  | 161,378    | 93,622   | <b>34,663</b>      | 90,195  | 164,805  | 183,594    | 71,406   | <b>93,399</b>      |
|                                               | 3          | 120,708 | 134,292  | 120,708    | 134,292  | <b>268,584</b>     | 107,303     | 147,697  | 159,66     | 95,34    | <b>52,357</b>      | 92,047  | 162,953  | 142,405    | 112,595  | <b>50,358</b>      |
|                                               | Mean (n=3) |         |          |            |          | <b>257,2736667</b> |             |          |            |          | <b>44,01933333</b> |         |          |            |          | <b>59,99766667</b> |
| UCLEVs (SEVs)                                 | 1          | 117,133 | 137,867  | 179,998    | 75,002   | <b>62,865</b>      | 152,237     | 102,763  | 178,674    | 76,326   | <b>26,437</b>      | 136     | 119      | 182,069    | 72,931   | <b>46,069</b>      |
|                                               | 2          | 135,417 | 119,583  | 135,417    | 119,583  | <b>0</b>           | 161,378     | 93,622   | 161,378    | 93,622   | <b>0</b>           | 104,63  | 150,37   | 183,594    | 71,406   | <b>78,964</b>      |
|                                               | 7          | 120,708 | 134,292  | 120,708    | 134,292  | <b>0</b>           | 159,66      | 95,34    | 159,66     | 95,34    | <b>0</b>           | 98,268  | 156,732  | 142,405    | 112,595  | <b>44,137</b>      |
|                                               | Mean (n=3) |         |          |            |          | <b>20,955</b>      |             |          |            |          | <b>8,812333333</b> |         |          |            |          | <b>56,39</b>       |
| UCLEVs (LEVs)                                 | 1          | 134,655 | 120,345  | 179,998    | 75,002   | <b>45,343</b>      | 177,175     | 77,825   | 178,674    | 76,326   | <b>1,499</b>       | 138,994 | 116,006  | 182,069    | 72,931   | <b>43,075</b>      |
|                                               | 2          | 135,417 | 119,583  | 135,417    | 119,583  | <b>0</b>           | 161,378     | 93,622   | 161,378    | 93,622   | <b>0</b>           | 117,684 | 137,316  | 183,594    | 71,406   | <b>65,91</b>       |
|                                               | 3          | 120,708 | 134,292  | 120,708    | 134,292  | <b>0</b>           | 159,66      | 95,34    | 159,66     | 95,34    | <b>0</b>           | 122,14  | 132,86   | 142,405    | 112,595  | <b>20,265</b>      |
|                                               | Mean (n=3) |         |          |            |          | <b>15,11433333</b> |             |          |            |          | <b>0,499666667</b> |         |          |            |          | <b>43,08333333</b> |

Abbreviation: OD – Optical Densitometry value

**Supplementary Table S3.** Calculated optical densitometry values of Western-blot correspondent to UC48min and UCwash protocols.

| Figure 4 |            | CD9     |          |            |          |                    | CD81    |          |            |          |                    | CD63    |          |            |          |                 |
|----------|------------|---------|----------|------------|----------|--------------------|---------|----------|------------|----------|--------------------|---------|----------|------------|----------|-----------------|
|          |            | CD9     | inverted | background | inverted | OD                 | CD81    | inverted | background | inverted | OD                 | CD63    | inverted | background | inverted | OD              |
| UC48min  | 1          | 112,615 | 142,39   | 180,833    | 74,17    | <b>68,22</b>       | 109,668 | 145,332  | 177,216    | 77,784   | <b>67,548</b>      | 89,02   | 165,98   | 179,536    | 75,464   | 90,516          |
|          | 2          | 112,795 | 142,21   | 185,257    | 69,74    | <b>72,46</b>       | 106,252 | 148,748  | 180,068    | 74,932   | <b>73,816</b>      | 181,112 | 73,888   | 181,112    | 73,888   | 0               |
|          | 3          | 106,077 | 148,92   | 185,257    | 69,74    | <b>79,18</b>       | 101,457 | 153,543  | 178,163    | 76,837   | <b>76,706</b>      | 118,611 | 136,389  | 181,112    | 73,888   | 62,501          |
|          | Mean (n=3) |         |          |            |          | <b>73,29</b>       |         |          |            |          | <b>72,69</b>       |         |          |            |          | <b>51,00567</b> |
| UCwash   | 1          | 153,233 | 101,767  | 180,833    | 74,17    | <b>27,60</b>       | 177,216 | 77,784   | 177,216    | 77,784   | <b>0</b>           | 179,536 | 75,464   | 179,536    | 75,464   | 0               |
|          | 2          | 137,172 | 117,828  | 185,257    | 69,74    | <b>48,09</b>       | 171,155 | 83,845   | 181,146    | 73,854   | <b>9,991</b>       | 181,112 | 73,888   | 181,112    | 73,888   | 0               |
|          | 3          | 155,106 | 99,894   | 185,257    | 69,74    | <b>30,15</b>       | 138,301 | 116,699  | 178,163    | 76,837   | <b>39,862</b>      | 181,112 | 73,888   | 181,112    | 73,888   | 0               |
|          | Mean (n=3) |         |          |            |          | <b>35,27866667</b> |         |          |            |          | <b>16,61766667</b> |         |          |            |          | <b>0</b>        |

  

| Figure 4 |            | Alix    |          |            |          |                    | Flotillin-1 |          |            |          |                    | THP     |          |            |          |                 |
|----------|------------|---------|----------|------------|----------|--------------------|-------------|----------|------------|----------|--------------------|---------|----------|------------|----------|-----------------|
|          |            | Alix    | inverted | background | inverted | OD                 | Flotillin-1 | inverted | background | inverted | OD                 | THP     | inverted | background | inverted | OD              |
| UC48min  | 1          | 104,035 | 150,965  | 174,536    | 80,464   | 70,501             | 155,498     | 99,502   | 178,674    | 76,326   | 23,176             | 90,227  | 164,773  | 176,295    | 78,705   | 86,068          |
|          | 2          | 149,26  | 105,74   | 178,818    | 76,182   | 29,558             | 179,49      | 75,51    | 179,49     | 75,51    | 0                  | 172,038 | 82,962   | 177,814    | 77,186   | 5,776           |
|          | 3          | 102,917 | 152,083  | 178,818    | 76,182   | 75,901             | 131,081     | 123,919  | 179,49     | 75,51    | 48,409             | 108,565 | 146,435  | 177,814    | 77,186   | 69,249          |
|          | Mean (n=3) |         |          |            |          | <b>58,65333333</b> |             |          |            |          | <b>23,86166667</b> |         |          |            |          | <b>53,69767</b> |
| UCwash   | 1          | 174,536 | 80,464   | 174,536    | 80,464   | 0                  | 178,674     | 76,326   | 178,674    | 76,326   | 0                  | 164,475 | 90,525   | 176,295    | 78,705   | 11,82           |
|          | 2          | 178,818 | 76,182   | 178,818    | 76,182   | 0                  | 179,49      | 75,51    | 179,49     | 75,51    | 0                  | 177,814 | 77,186   | 177,814    | 77,186   | 0               |
|          | 3          | 153,216 | 101,784  | 178,818    | 76,182   | 25,602             | 170,845     | 84,155   | 179,49     | 75,51    | 8,645              | 130,517 | 124,483  | 177,814    | 77,186   | 47,297          |
|          | Mean (n=3) |         |          |            |          | <b>8,534</b>       |             |          |            |          | <b>2,881666667</b> |         |          |            |          | <b>19,70567</b> |

Abbreviation: OD – Optical Densitometry value

**Supplementary Table S4.** Calculated optical densitometry values of Western-blot correspondent to UC48min and dUC and EXO protocols.

| Figure 5 |            | CD9     |          |            |          |              | CD81    |          |            |          |                    | CD63    |          |            |          |                    |
|----------|------------|---------|----------|------------|----------|--------------|---------|----------|------------|----------|--------------------|---------|----------|------------|----------|--------------------|
|          |            | CD9     | inverted | background | inverted | OD           | CD81    | inverted | background | inverted | OD                 | CD63    | inverted | background | inverted | OD                 |
| UC48min  | 1          | 132,087 | 122,91   | 181,737    | 73,26    | <b>49,65</b> | 137,598 | 117,402  | 180,845    | 74,155   | <b>43,247</b>      | 134,058 | 120,942  | 177,376    | 77,624   | <b>43,318</b>      |
|          | 2          | 153,056 | 101,94   | 181,737    | 73,26    | <b>28,68</b> | 131,291 | 123,709  | 180,845    | 74,155   | <b>49,554</b>      | 108,933 | 146,067  | 177,376    | 77,624   | <b>68,443</b>      |
|          | 3          | 144,908 | 110,09   | 175,464    | 79,54    | <b>30,56</b> | 126,863 | 128,137  | 180,845    | 74,155   | <b>53,982</b>      | 165,027 | 89,973   | 177,395    | 77,605   | <b>12,368</b>      |
|          | Mean (n=3) |         |          |            |          | <b>36,30</b> |         |          |            |          | <b>48,92766667</b> |         |          |            |          | <b>41,37633333</b> |
| dUC      | 1          | 159,257 | 95,74    | 181,737    | 73,26    | <b>22,48</b> | 180,845 | 74,155   | 180,845    | 74,155   | <b>0</b>           | 177,376 | 77,624   | 177,376    | 77,624   | <b>0</b>           |
|          | 2          | 163,48  | 91,52    | 181,737    | 73,26    | <b>18,26</b> | 178,944 | 76,056   | 180,845    | 74,155   | <b>1,901</b>       | 177,376 | 77,624   | 177,376    | 77,624   | <b>0</b>           |
|          | 3          | 175,464 | 79,54    | 175,464    | 79,54    | <b>0,00</b>  | 180,845 | 74,155   | 180,845    | 74,155   | <b>0</b>           | 177,395 | 77,605   | 177,395    | 77,605   | <b>0</b>           |
|          | Mean (n=3) |         |          |            |          | <b>13,58</b> |         |          |            |          | <b>0,633666667</b> |         |          |            |          | <b>0</b>           |
| EXO      | 1          | 181,737 | 73,26    | 181,737    | 73,26    | <b>0,00</b>  | 180,845 | 74,155   | 180,845    | 74,155   | <b>0</b>           | 177,376 | 77,624   | 177,376    | 77,624   | <b>0</b>           |
|          | 2          | 181,737 | 73,26    | 181,737    | 73,26    | <b>0,00</b>  | 180,845 | 74,155   | 180,845    | 74,155   | <b>0</b>           | 177,376 | 77,624   | 177,376    | 77,624   | <b>0</b>           |
|          | 3          | 175,464 | 79,54    | 175,464    | 79,54    | <b>0,00</b>  | 180,845 | 74,155   | 180,845    | 74,155   | <b>0</b>           | 177,395 | 77,605   | 177,395    | 77,605   | <b>0</b>           |
|          | Mean (n=3) |         |          |            |          | <b>0,00</b>  |         |          |            |          | <b>0</b>           |         |          |            |          | <b>0</b>           |

  

| Figure 5 |            | Alix    |          |            |          |                    | Flotillin-1 |          |            |          |                    | THP     |          |            |          |                    |
|----------|------------|---------|----------|------------|----------|--------------------|-------------|----------|------------|----------|--------------------|---------|----------|------------|----------|--------------------|
|          |            | Alix    | inverted | background | inverted | OD                 | Flotillin-1 | inverted | background | inverted | Densitometry       | THP     | inverted | background | inverted | OD                 |
| UC48min  | 1          | 127,166 | 127,834  | 178,504    | 76,496   | <b>204,33</b>      | 117,66      | 137,34   | 175,855    | 79,145   | <b>58,195</b>      | 114,62  | 140,38   | 182,008    | 72,992   | <b>67,388</b>      |
|          | 2          | 133,358 | 121,642  | 178,504    | 76,496   | <b>198,138</b>     | 121,952     | 133,048  | 175,855    | 79,145   | <b>53,903</b>      | 154,653 | 100,347  | 182,008    | 72,992   | <b>27,355</b>      |
|          | 3          | 157,416 | 97,584   | 175,819    | 79,181   | <b>176,765</b>     | 131,063     | 123,937  | 176,817    | 78,183   | <b>45,754</b>      | 166,349 | 88,651   | 182,442    | 72,558   | <b>16,093</b>      |
|          | Mean (n=3) |         |          |            |          | <b>193,0776667</b> |             |          |            |          | <b>52,61733333</b> |         |          |            |          | <b>36,94533333</b> |
| dUC      | 1          | 136,433 | 118,567  | 178,504    | 76,496   | <b>42,071</b>      | 139,309     | 115,691  | 175,855    | 79,145   | <b>36,546</b>      | 182,008 | 72,992   | 182,008    | 72,992   | <b>0</b>           |
|          | 2          | 136,122 | 118,878  | 178,504    | 76,496   | <b>42,382</b>      | 152,235     | 102,765  | 175,855    | 79,145   | <b>23,62</b>       | 182,008 | 72,992   | 182,008    | 72,992   | <b>0</b>           |
|          | 3          | 175,819 | 79,181   | 175,819    | 79,181   | <b>0</b>           | 176,817     | 78,183   | 176,817    | 78,183   | <b>0</b>           | 176,948 | 78,052   | 182,442    | 72,558   | <b>5,494</b>       |
|          | Mean (n=3) |         |          |            |          | <b>28,151</b>      |             |          |            |          | <b>20,05533333</b> |         |          |            |          | <b>1,831333333</b> |
| EXO      | 1          | 178,504 | 76,496   | 178,504    | 76,496   | <b>0</b>           | 175,855     | 79,145   | 175,855    | 79,145   | <b>0</b>           | 163,155 | 91,845   | 182,008    | 72,992   | <b>18,853</b>      |
|          | 2          | 142,112 | 112,888  | 178,504    | 76,496   | <b>36,392</b>      | 175,855     | 79,145   | 175,855    | 79,145   | <b>0</b>           | 105,351 | 149,649  | 182,008    | 72,992   | <b>76,657</b>      |
|          | 3          | 175,819 | 79,181   | 175,819    | 79,181   | <b>0</b>           | 176,817     | 78,183   | 176,817    | 78,183   | <b>0</b>           | 82,346  | 172,654  | 182,442    | 72,558   | <b>100,096</b>     |
|          | Mean (n=3) |         |          |            |          | <b>12,13066667</b> |             |          |            |          | <b>0</b>           |         |          |            |          | <b>65,202</b>      |

Abbreviation: OD – Optical Densitometry value

**Supplementary Table S5.** Calculated optical densitometry values of Western-blots correspondent to UC48min and dUC methods.

| Figure S3 in             |            | CD9     |          |            |          |               | CD81    |          |            |          |                    | CD63    |          |            |          |                    | Alix    |          |            |          |                    |
|--------------------------|------------|---------|----------|------------|----------|---------------|---------|----------|------------|----------|--------------------|---------|----------|------------|----------|--------------------|---------|----------|------------|----------|--------------------|
| Supplementary Material 1 |            | CD9     | inverted | background | inverted | OD            | CD81    | inverted | background | inverted | OD                 | CD63    | inverted | background | inverted | OD                 | Alix    | inverted | background | inverted | Densitometry       |
| UC48min                  | 1          | 85,675  | 169,33   | 236,129    | 18,87    | <b>150,45</b> | 80,04   | 174,957  | 235,112    | 19,888   | <b>155,069</b>     | 71,628  | 183,372  | 232,27     | 22,73    | <b>160,642</b>     | 66,966  | 188,034  | 236,056    | 18,944   | <b>206,978</b>     |
|                          | 2          | 56,3    | 198,70   | 236,129    | 18,87    | <b>179,83</b> | 64,844  | 190,156  | 235,112    | 19,888   | <b>170,268</b>     | 48,952  | 206,048  | 232,27     | 22,73    | <b>183,318</b>     | 61,578  | 193,422  | 236,056    | 18,944   | <b>212,366</b>     |
|                          | 3          | 146,161 | 108,84   | 236,129    | 18,87    | <b>89,97</b>  | 110,069 | 144,931  | 235,112    | 19,888   | <b>125,043</b>     | 67,3    | 187,7    | 232,27     | 22,73    | <b>164,97</b>      | 52,927  | 202,073  | 236,056    | 18,944   | <b>221,017</b>     |
|                          | Mean (n=3) |         |          |            |          | <b>140,08</b> |         |          |            |          | <b>150,1266667</b> |         |          |            |          | <b>169,6433333</b> |         |          |            |          | <b>213,4536667</b> |
| dUC                      | 1          | 231,999 | 23,00    | 236,129    | 18,87    | <b>4,13</b>   | 235,112 | 19,888   | 235,112    | 19,888   | <b>0</b>           | 198,441 | 56,559   | 232,27     | 22,73    | <b>33,829</b>      | 217,094 | 37,906   | 236,056    | 18,944   | <b>56,85</b>       |
|                          | 2          | 92,817  | 162,18   | 236,129    | 18,87    | <b>143,31</b> | 235,112 | 19,888   | 235,112    | 19,888   | <b>0</b>           | 208,904 | 46,096   | 232,27     | 22,73    | <b>23,366</b>      | 175,178 | 79,822   | 236,056    | 18,944   | <b>98,766</b>      |
|                          | 3          | 236,129 | 18,87    | 236,129    | 18,87    | <b>0,00</b>   | 235,112 | 19,888   | 235,112    | 19,888   | <b>0</b>           | 98,586  | 156,414  | 232,27     | 22,73    | <b>133,684</b>     | 99,395  | 155,605  | 236,056    | 18,944   | <b>136,661</b>     |
|                          | Mean (n=3) |         |          |            |          | <b>49,15</b>  |         |          |            |          | <b>0</b>           |         |          |            |          | <b>63,62633333</b> |         |          |            |          | <b>97,42566667</b> |

  

| Figure S3 in             |            | Flotillin-1 |          |            |          |                    | THP     |          |            |          |                | Cytochrome C |          |            |          |          |
|--------------------------|------------|-------------|----------|------------|----------|--------------------|---------|----------|------------|----------|----------------|--------------|----------|------------|----------|----------|
| Supplementary Material 1 |            | Flotillin-1 | inverted | background | inverted | OD                 | THP     | inverted | background | inverted | OD             | Cytochron    | inverted | background | inverted | OD       |
| UC48min                  | 1          | 232,253     | 22,747   | 232,253    | 22,747   | 0                  | 74,574  | 180,426  | 211,818    | 43,182   | 137,244        | 244,41       | 10,59    | 244,41     | 10,59    | 0        |
|                          | 2          | 168,556     | 86,444   | 232,253    | 22,747   | 63,697             | 60,033  | 194,967  | 211,818    | 43,182   | 151,785        | 244,41       | 10,59    | 244,41     | 10,59    | 0        |
|                          | 3          | 202,513     | 52,487   | 232,253    | 22,747   | 29,74              | 58,239  | 196,761  | 211,818    | 43,182   | 153,579        | 244,41       | 10,59    | 244,41     | 10,59    | 0        |
|                          | Mean (n=3) |             |          |            |          | <b>31,14566667</b> |         |          |            |          | <b>147,536</b> |              |          |            |          | <b>0</b> |
| dUC                      | 1          | 232,253     | 22,747   | 232,253    | 22,747   | 0                  | 207,759 | 47,241   | 211,818    | 43,182   | 4,059          | 244,41       | 10,59    | 244,41     | 10,59    | 0        |
|                          | 2          | 232,253     | 22,747   | 232,253    | 22,747   | 0                  | 85,221  | 169,779  | 211,818    | 43,182   | 126,597        | 244,41       | 10,59    | 244,41     | 10,59    | 0        |
|                          | 3          | 232,253     | 22,747   | 232,253    | 22,747   | 0                  | 150,096 | 104,904  | 211,818    | 43,182   | 61,722         | 244,41       | 10,59    | 244,41     | 10,59    | 0        |
|                          | Mean (n=3) |             |          |            |          | <b>0</b>           |         |          |            |          | <b>64,126</b>  |              |          |            |          | <b>0</b> |

Abbreviation: OD – Optical Densitometry value

**Supplementary Table S6.** Calculated optical densitometry values of Western-blots correspondent to UC48min protocol.

| Figure S6 in             |            | CD9     |          |            |          |              | CD81         |          |            |          |               | CD63            |          |            |          |                  | Alix             |          |            |          |                |
|--------------------------|------------|---------|----------|------------|----------|--------------|--------------|----------|------------|----------|---------------|-----------------|----------|------------|----------|------------------|------------------|----------|------------|----------|----------------|
| Supplementary Material 1 |            | CD9     | inverted | background | inverted | OD           | CD81         | inverted | background | inverted | OD            | CD63            | inverted | background | inverted | OD               | Alix             | inverted | background | inverted | OD             |
| UC48min                  | 1          | 97,206  | 157,79   | 178,981    | 76,02    | <b>81,78</b> | 97,64        | 157,36   | 156,832    | 98,168   | <b>59,192</b> | 86,148          | 168,852  | 159,423    | 95,577   | <b>73,275</b>    | 114,808          | 140,192  | 175,821    | 79,179   | <b>219,371</b> |
|                          | 2          | 96,212  | 158,79   | 178,982    | 76,02    | <b>82,77</b> | 117,446      | 137,554  | 156,832    | 98,168   | <b>39,386</b> | 141,654         | 113,346  | 159,423    | 95,577   | <b>17,769</b>    | 118,221          | 136,779  | 175,821    | 79,179   | <b>215,958</b> |
|                          | 3          | 107,508 | 147,49   | 178,983    | 76,02    | <b>71,48</b> | 124,478      | 130,522  | 156,832    | 98,168   | <b>32,354</b> | 108,416         | 146,584  | 159,423    | 95,577   | <b>51,007</b>    | 139,721          | 115,279  | 175,821    | 79,179   | <b>194,458</b> |
|                          | 4          | 144,7   | 110,30   | 178,984    | 76,02    | <b>34,28</b> | 156,832      | 98,168   | 156,832    | 98,168   | <b>0</b>      | 159,423         | 95,577   | 159,423    | 95,577   | <b>47,350333</b> | 169,922          | 85,078   | 175,821    | 79,179   | <b>164,257</b> |
|                          | 5          | 112,075 | 142,93   | 178,985    | 76,02    | <b>66,91</b> | 103,549      | 151,451  | 156,832    | 98,168   | <b>53,283</b> | 87,593          | 167,407  | 159,423    | 95,577   | <b>71,83</b>     | 111,488          | 143,512  | 175,821    | 79,179   | <b>222,691</b> |
|                          | 6          | 88,331  | 166,67   | 178,986    | 76,01    | <b>90,66</b> | 82,484       | 172,516  | 156,832    | 98,168   | <b>74,348</b> | 72,779          | 182,221  | 159,423    | 95,577   | <b>86,644</b>    | 104,409          | 150,591  | 175,821    | 79,179   | <b>71,412</b>  |
|                          | 7          | 97,846  | 157,15   | 178,987    | 76,01    | <b>81,14</b> | 87,638       | 167,362  | 156,832    | 98,168   | <b>69,194</b> | 72,63           | 182,37   | 159,423    | 95,577   | <b>86,793</b>    | 99,15            | 155,85   | 175,821    | 79,179   | <b>76,671</b>  |
|                          | Mean (n=7) |         |          |            |          |              | <b>72,72</b> |          |            |          |               | <b>46,82243</b> |          |            |          |                  | <b>62,095476</b> |          |            |          |                |

  

| Figure S6 in             |            | Flotillin-1 |          |            |          |               | THP             |          |            |          |               | Lamin A/C       |          |            |          |          | Cytochrome C |          |            |          |          |
|--------------------------|------------|-------------|----------|------------|----------|---------------|-----------------|----------|------------|----------|---------------|-----------------|----------|------------|----------|----------|--------------|----------|------------|----------|----------|
| Supplementary Material 1 |            | Flotillin-1 | inverted | background | inverted | OD            | THP             | inverted | background | inverted | OD            | Lamin A/C       | inverted | background | inverted | OD       | Cytochron    | inverted | background | inverted | OD       |
| UC48min                  | 1          | 108,245     | 146,755  | 145,006    | 109,994  | <b>36,761</b> | 113,755         | 141,245  | 168,15     | 86,85    | <b>54,395</b> | 161,585         | 93,415   | 161,585    | 93,415   | <b>0</b> | 169,463      | 85,537   | 169,463    | 85,537   | <b>0</b> |
|                          | 2          | 145,006     | 109,994  | 145,006    | 109,994  | <b>0</b>      | 150,264         | 104,736  | 168,15     | 86,85    | <b>17,886</b> | 161,585         | 93,415   | 161,585    | 93,415   | <b>0</b> | 169,463      | 85,537   | 169,463    | 85,537   | <b>0</b> |
|                          | 3          | 145,006     | 109,994  | 145,006    | 109,994  | <b>0</b>      | 100,696         | 154,304  | 168,15     | 86,85    | <b>67,454</b> | 161,585         | 93,415   | 161,585    | 93,415   | <b>0</b> | 169,463      | 85,537   | 169,463    | 85,537   | <b>0</b> |
|                          | 4          | 145,006     | 109,994  | 145,006    | 109,994  | <b>0</b>      | 168,15          | 86,85    | 168,15     | 86,85    | <b>0</b>      | 161,585         | 93,415   | 161,585    | 93,415   | <b>0</b> | 169,463      | 85,537   | 169,463    | 85,537   | <b>0</b> |
|                          | 5          | 139,993     | 115,007  | 145,006    | 109,994  | <b>5,013</b>  | 127,731         | 127,269  | 168,15     | 86,85    | <b>40,419</b> | 161,585         | 93,415   | 161,585    | 93,415   | <b>0</b> | 169,463      | 85,537   | 169,463    | 85,537   | <b>0</b> |
|                          | 6          | 102,413     | 152,587  | 145,006    | 109,994  | <b>42,593</b> | 133,712         | 121,288  | 168,15     | 86,85    | <b>34,438</b> | 161,585         | 93,415   | 161,585    | 93,415   | <b>0</b> | 169,463      | 85,537   | 169,463    | 85,537   | <b>0</b> |
|                          | 7          | 122,459     | 132,541  | 145,006    | 109,994  | <b>22,547</b> | 108,262         | 146,738  | 168,15     | 86,85    | <b>59,888</b> | 161,585         | 93,415   | 161,585    | 93,415   | <b>0</b> | 169,463      | 85,537   | 169,463    | 85,537   | <b>0</b> |
|                          | Mean (n=7) |             |          |            |          |               | <b>15,27343</b> |          |            |          |               | <b>39,21143</b> |          |            |          | <b>0</b> |              |          |            |          |          |

Abbreviation: OD – Optical Densitometry value
